# Supplementary material for: Target delivery of β-cyclodextrin/paclitaxel complexed fluorescent carbon nanoparticles: externally NIR light and internally pH sensitive-mediated release of paclitaxel with bio-imaging
Source: Royal Society of Chemistry journal article supplement (doi:10.1039/c5tb00779h), 2015-01-01
Supplement: c5tb00779h1.pdf [file c5tb00779h1.pdf]

## Supporting Information

# Target Delivery of $\beta$ -Cyclodextrin/Paclitaxel Complexed Fluorescence Carbon Nanoparticles: Externally NIR light and Internally pH sensitive-Mediated Release of Paclitaxel with Bio-imaging

*Shazid Md. Sharker, <sup>a</sup> Sung Min Kim, <sup>b</sup> Sung Han Kim, <sup>c</sup> Insik In, <sup>c, d</sup> Haeshin Lee, <sup>a</sup> \* Sung Young Park <sup>b, c</sup>\**

<sup>a</sup> Department of Chemistry, Korea Advanced Institute of Science and Technology (KAIST),  
Daejeon 305-701, Republic of Korea.

<sup>b</sup> Department of Chemical and Biological Engineering, Korea National University of  
Transportation, Chungju 380-702, Republic of Korea.

<sup>c</sup> Department of IT Convergence, Korea National University of Transportation, Chungju 380-  
702, Republic of Korea.

<sup>d</sup> Department of Polymer Science and Engineering, Korea National University of Transportation,  
Chungju 380-702, Republic of Korea.

## Corresponding Author

\*Professor Haeshin Lee, E-mail: [haeshin@kaist.ac.kr](mailto:haeshin@kaist.ac.kr)

\*Professor Sung Young Park, E-mail: [parkchem@ut.ac.kr](mailto:parkchem@ut.ac.kr)

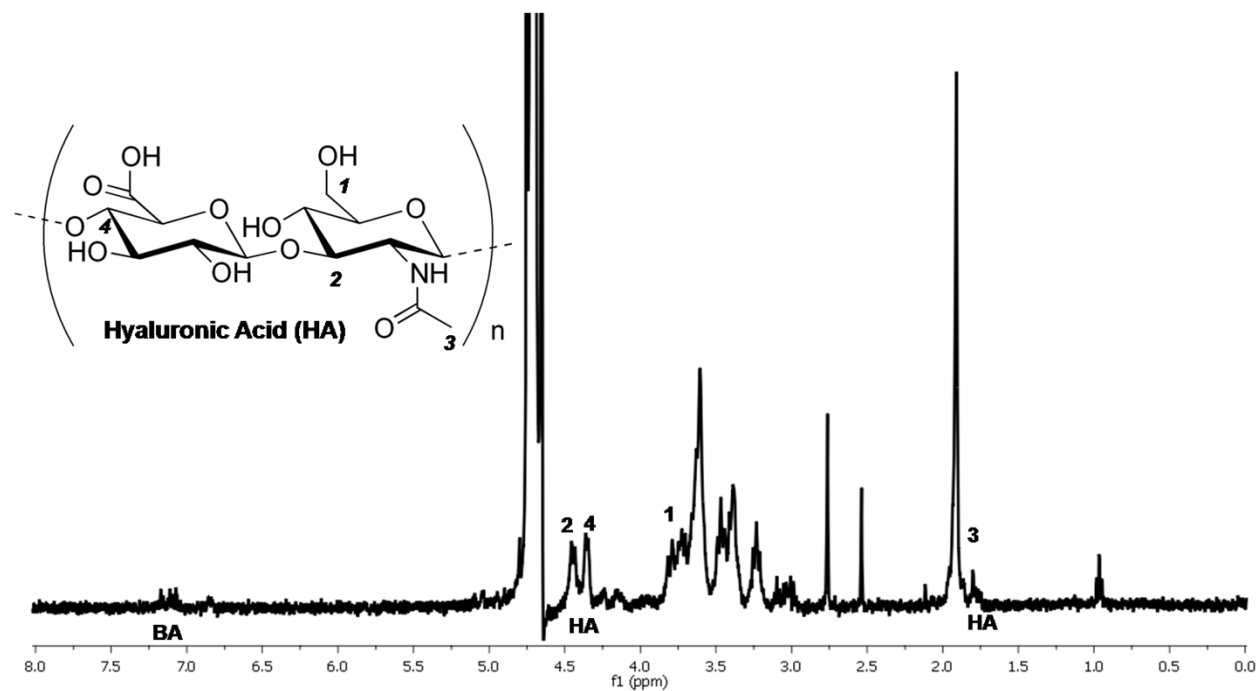

Figure S1.  $^1\text{H}$  NMR spectra (400 MHz,  $\text{D}_2\text{O}$ ) of HA-FCN conjugated boronic acid (HA-FCN-BA).

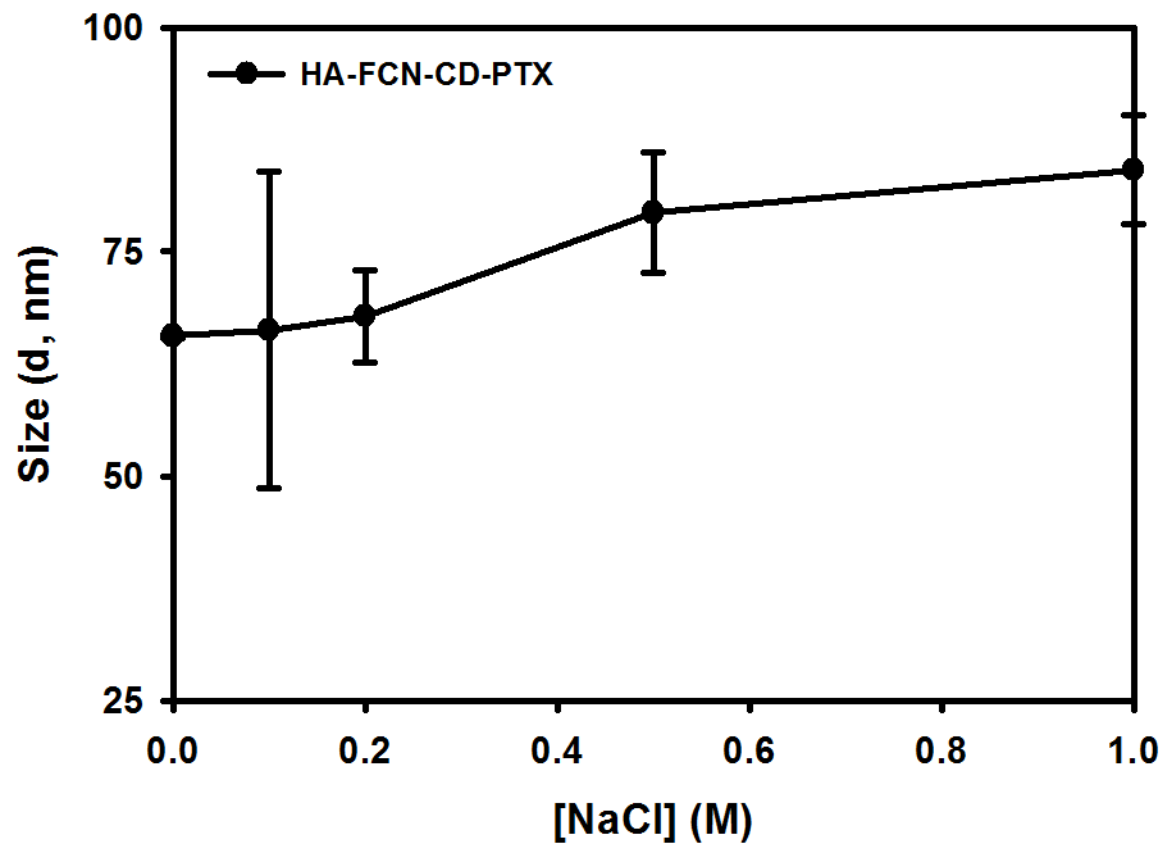

Figure S2. The salt effect on the size of HA-FCN-BA- $\beta$ -CD-PTX in 0.1mg/mL, where [NaCl] = 0, 0.1, 0.2, 0.5 and 1.0 M. Error bars represent  $\pm$ s.d. from  $n=5$ .

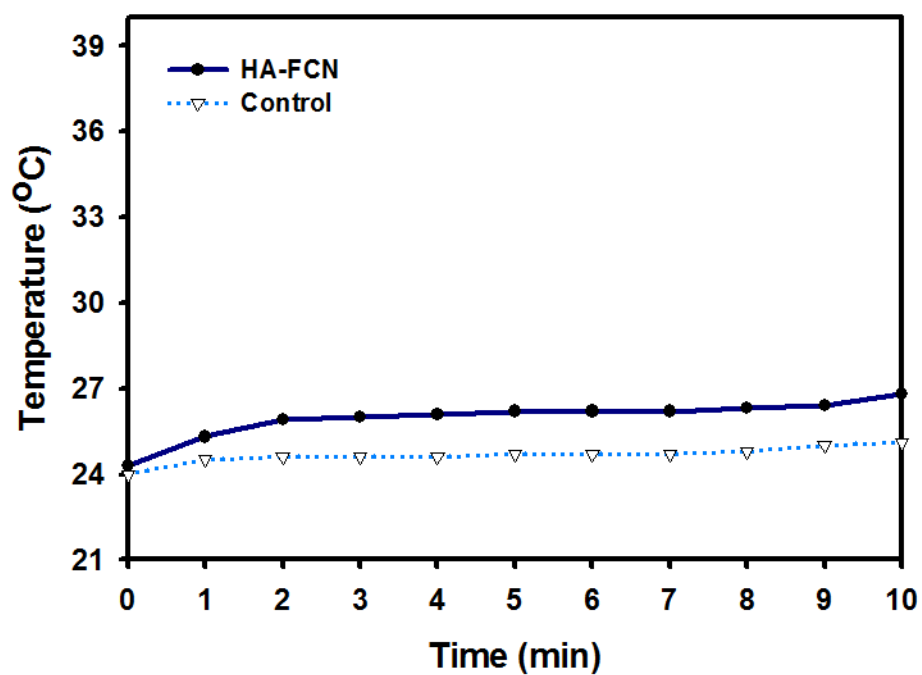

Figure S3. The temperature elevation curve of aqueous solution (1 mg/mL) of HA-FCN and control (H<sub>2</sub>O) as a function of NIR (808 nm laser) irradiation time.

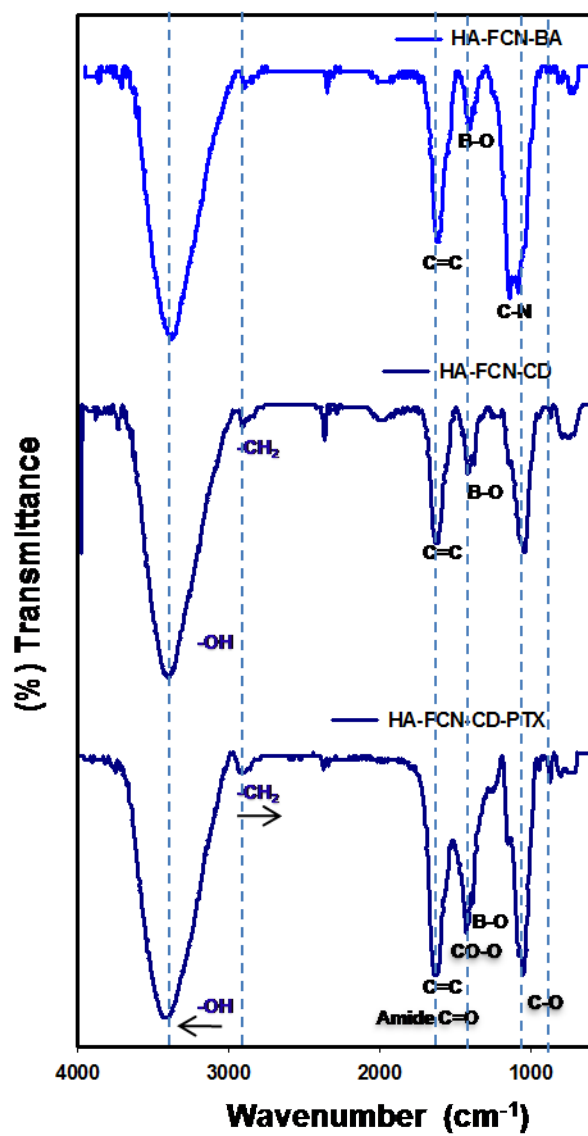

Figure S4. The FT-IR transmittance peaks of HA-FCN-BA, HA-FCN-CD and HA-FCN-BA-CD-PTX, respectively.

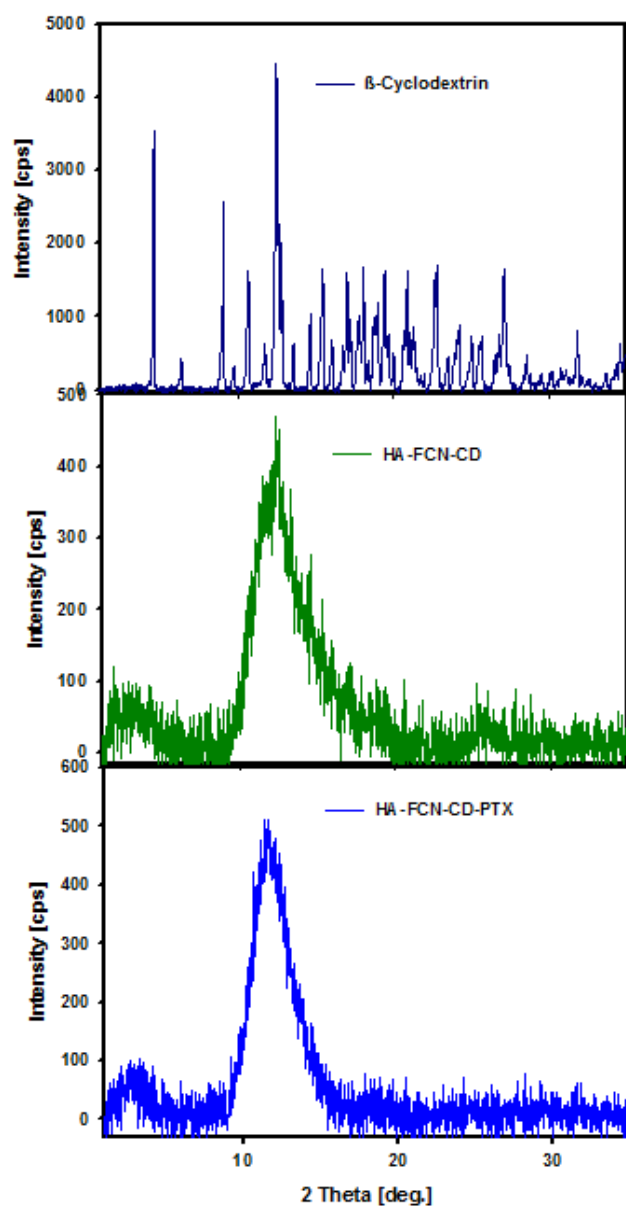

Figure S5. The XRD diffraction pattern of  $\beta$ -cyclodextrin ( $\beta$ -CD), HA-FCN-CD, and HA-FCN-CD-PTX, respectively.

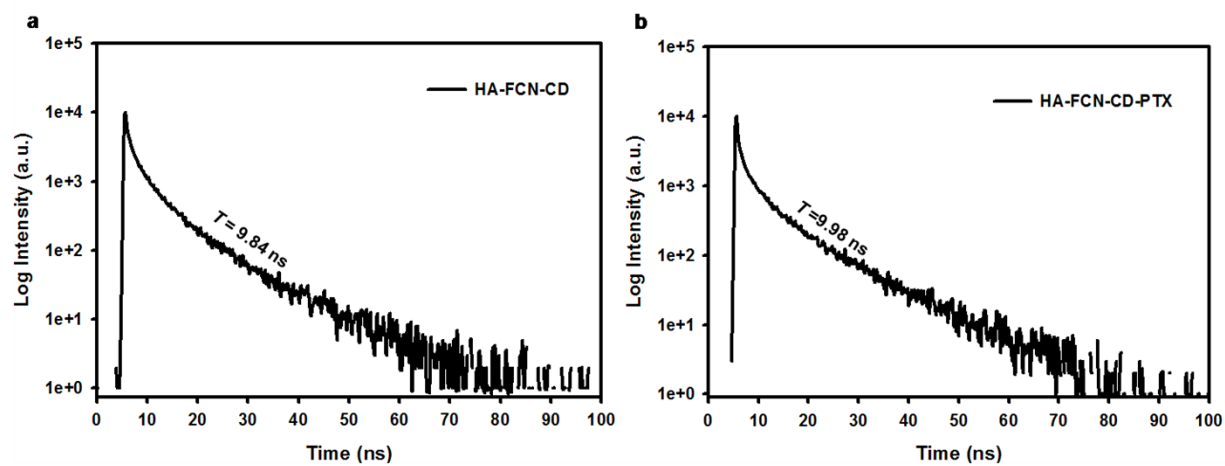

Figure S6. Fluorescence life time curve of HA-FCN-CD (a) and HA-FCN-CD-PTX (b) in 375 nm wavelength. The  $\tau$  value indicates respective fluorescence lifetime.

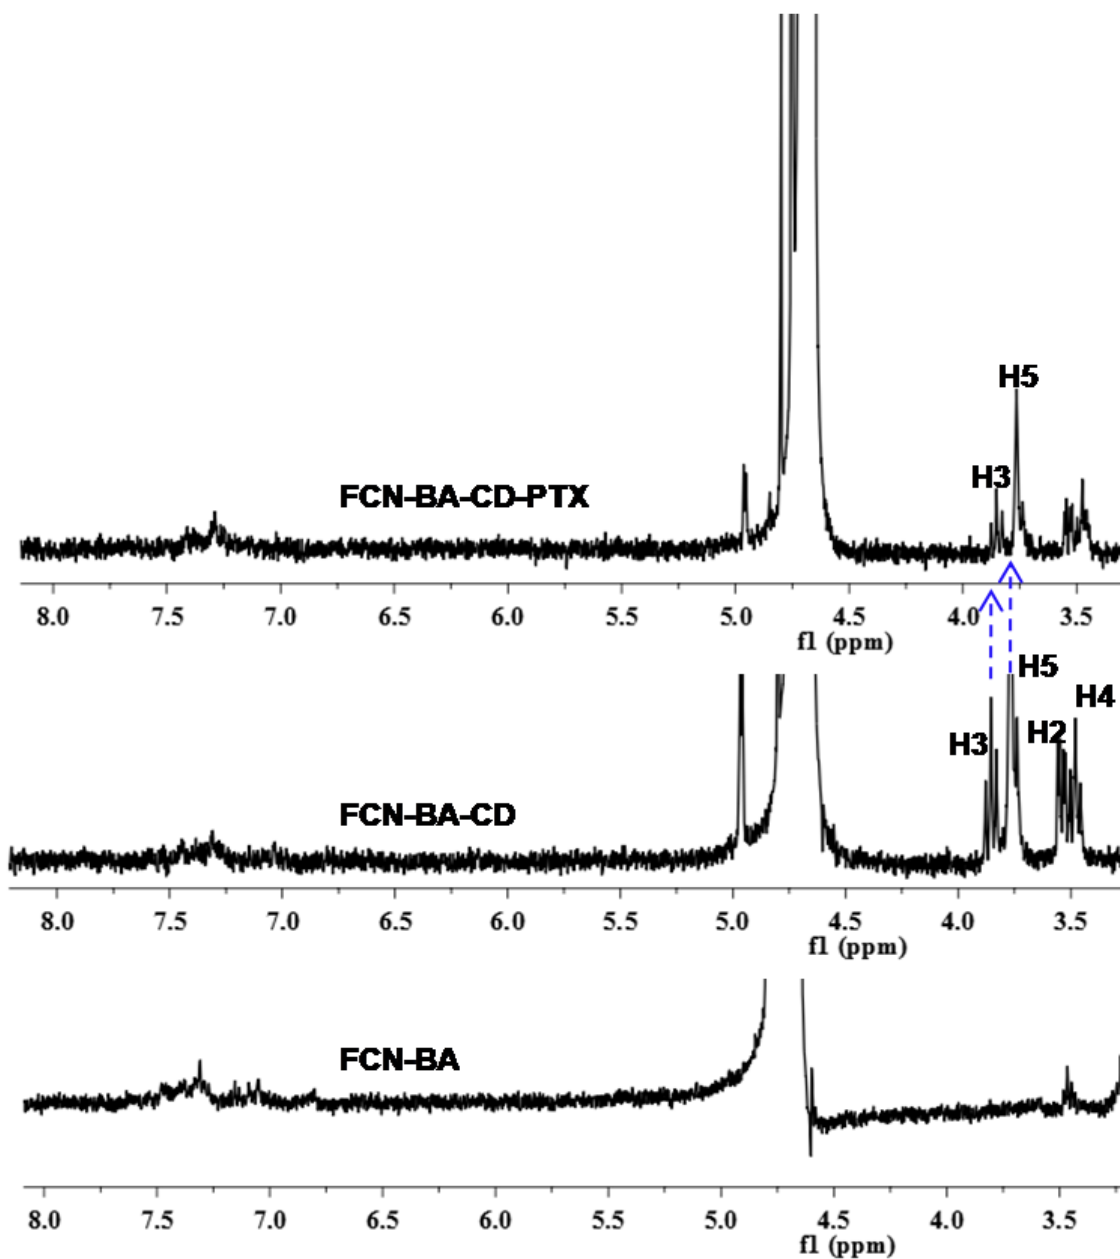

Figure S7.  $^1\text{H}$  NMR spectra (400 MHz,  $\text{D}_2\text{O}$ ) of FCN conjugated boronic acid (FCN-BA), FCN-BA-CD and FCN-BA-CD-PTX, respectively.



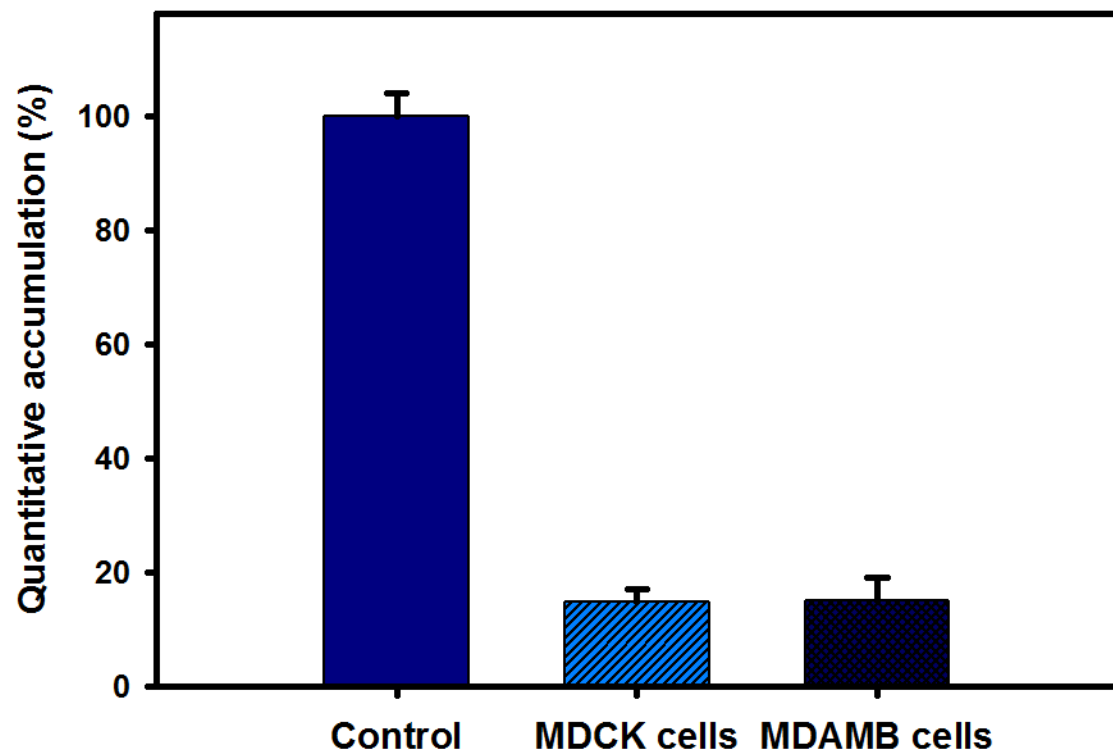

Figure S8. The *in vitro* quantitative analysis of cellular uptake of FCN-CD-PTX in MDCK and MDAMB cells.

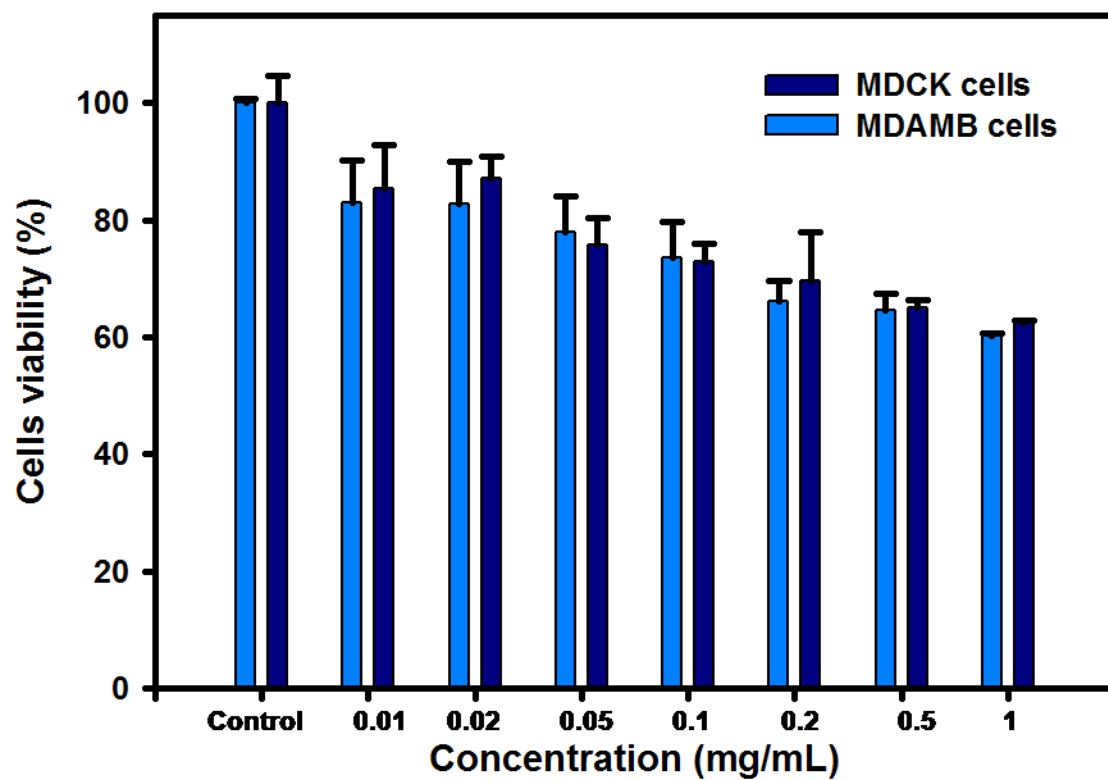

Figure S9. MTT assay for *in vitro* anticancer effects in absence of HA. Cell viability when treated with various concentrations of FCN-CD-PTX in MDCK and MDAMB cells line.

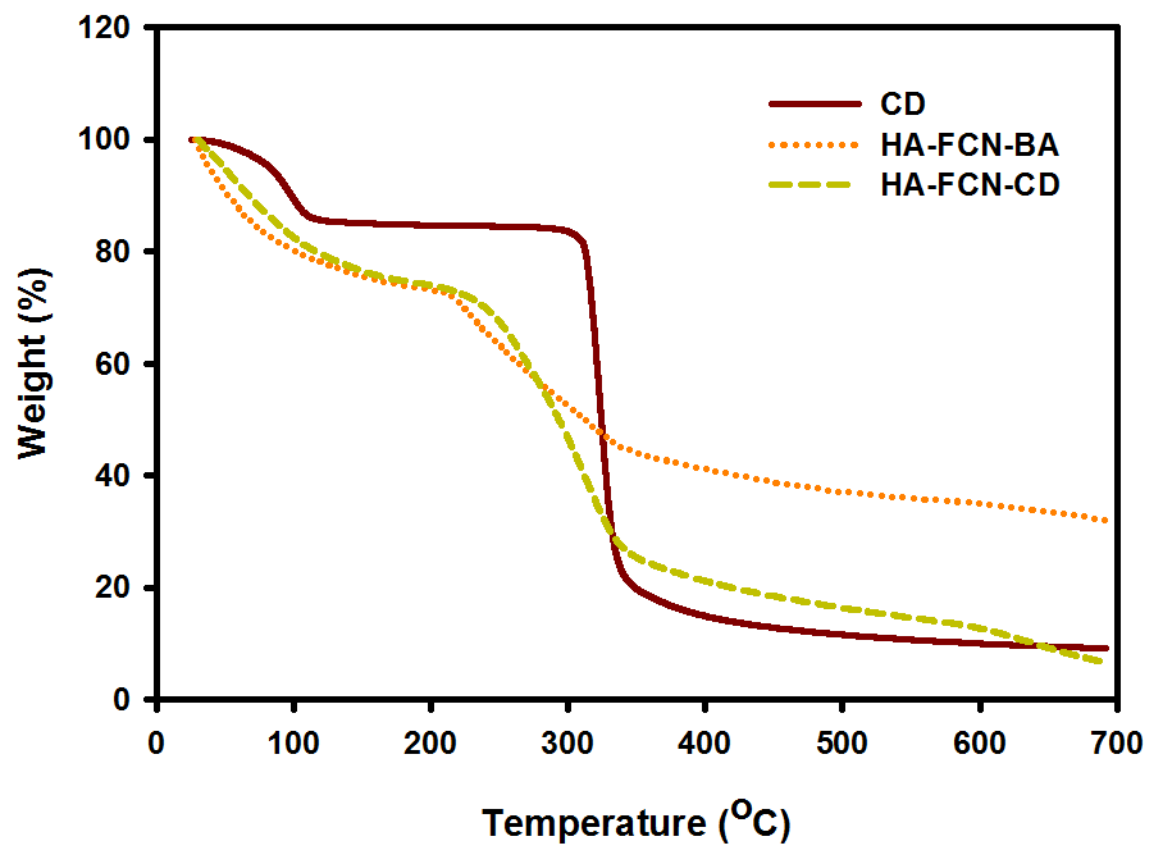

Figure S10. The comparison of thermogravimetric analysis (TGA) of the CD, HA-FCN-BA and HA-FCN-CD as a function weight loss and temperature (°C).

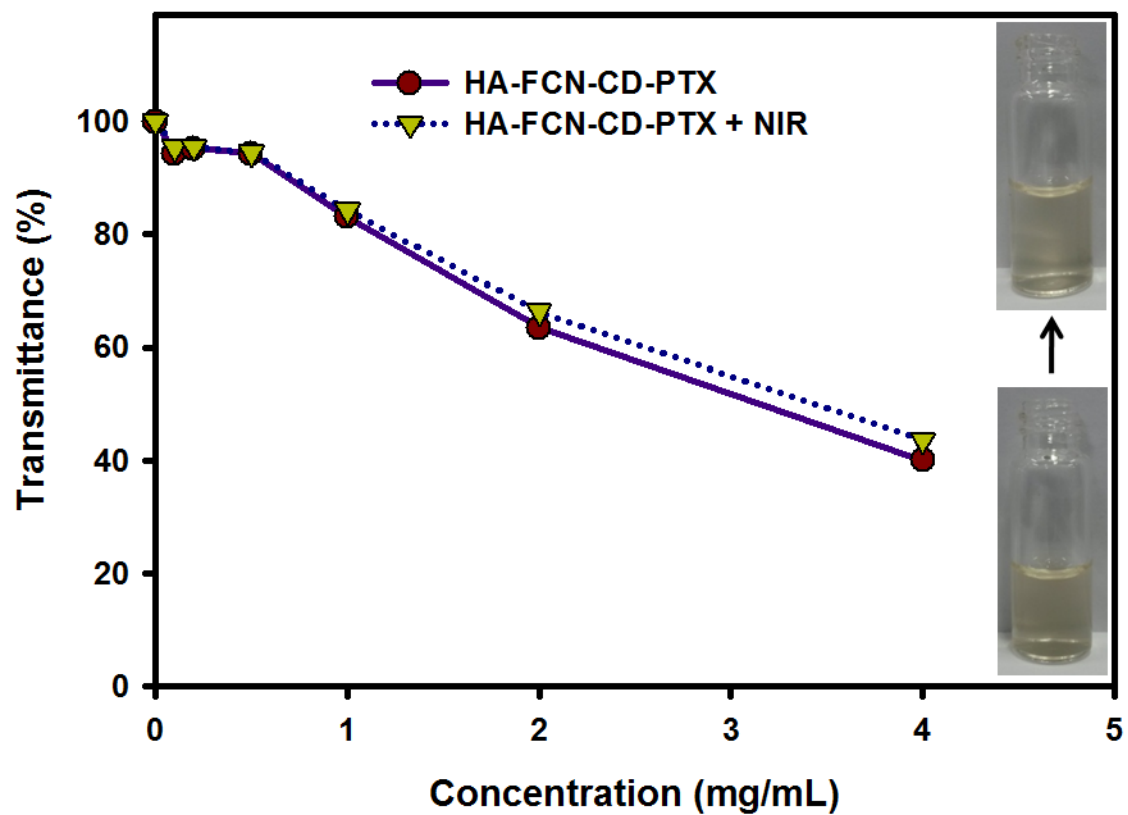

Figure S11. The solubility and transmittance study of HA-FCN-CD-PTX at different concentrations (0 - 4 mg/mL) in response to 5 min NIR irradiation (808 nm, 2 W/cm<sup>2</sup>).

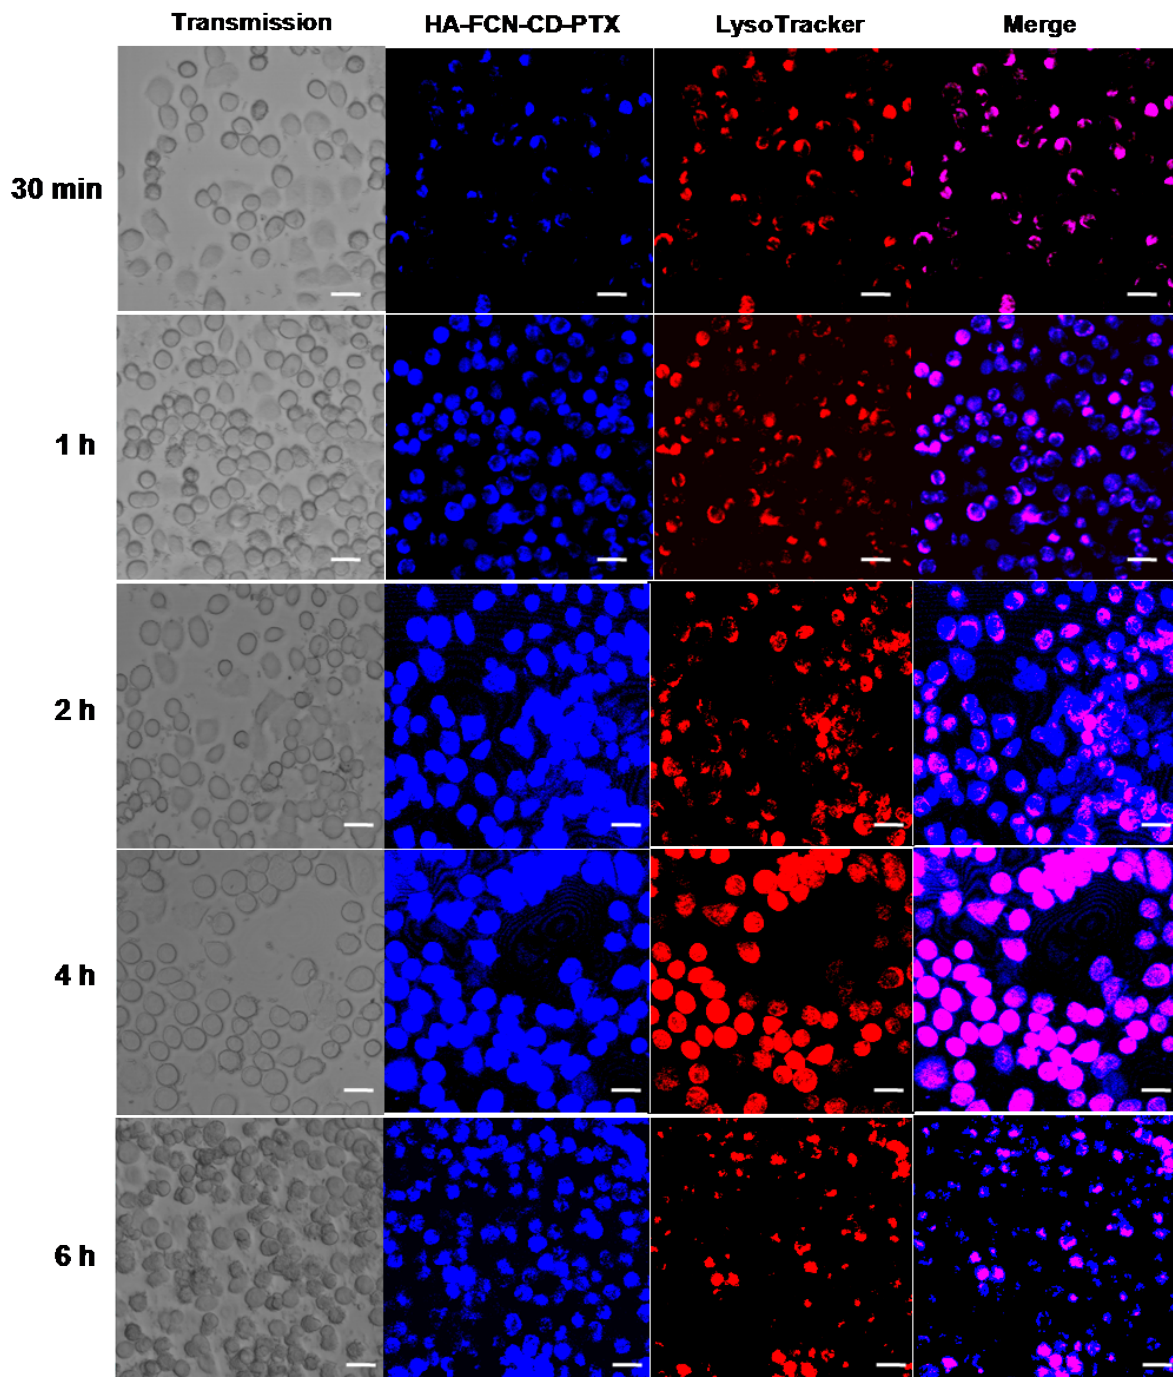

Figure S12. Confocal laser scan microscope (CLSM) image of MDAMB cells incubated with HA-FCN-CD-PTX for 30 min, 1 h, 2 h, 4 h and 6 h (HA-FCN-CD-PTX concentration: 0.1 mg/mL and NIR irradiation 5 min). (Blue, HA-FCN-CD-PTX; Red, LysoTracker). The scale bars represent a distance of 20  $\mu$ m.
